# Supplementary material
Source: Research Square preprint supplement (doi:10.21203/rs.3.rs-9183371/v1)
Supplement: Supplementary file 1 [file 859a76dc68a72b2aeccd2a61.docx]

Chitosan Enhances Germination and Growth of Rice Plant (*Oryza sativa*) while controlling *Rhizoctonia solani* Infection

Subhransu Sekhar Beheraa, Seemon Giria, Zahra Parweza,

Smaranika Pradhana, Lopamudra Raya*

aSchool of Biotechnology, KIIT Deemed to be University, Bhubaneswar, Odisha, India

* Corresponding Author

Dr Lopamudra Ray,

Asst. Professor, School of Biotechnology,

Kalinga Institute of Industrial Technology (KIIT), Deemed to be University, Bhubaneswar, Odisha, India.

Email: loparay@gmail.com, [lray@kiitbiotech.ac.in](mailto:lray@kiitbiotech.ac.in)


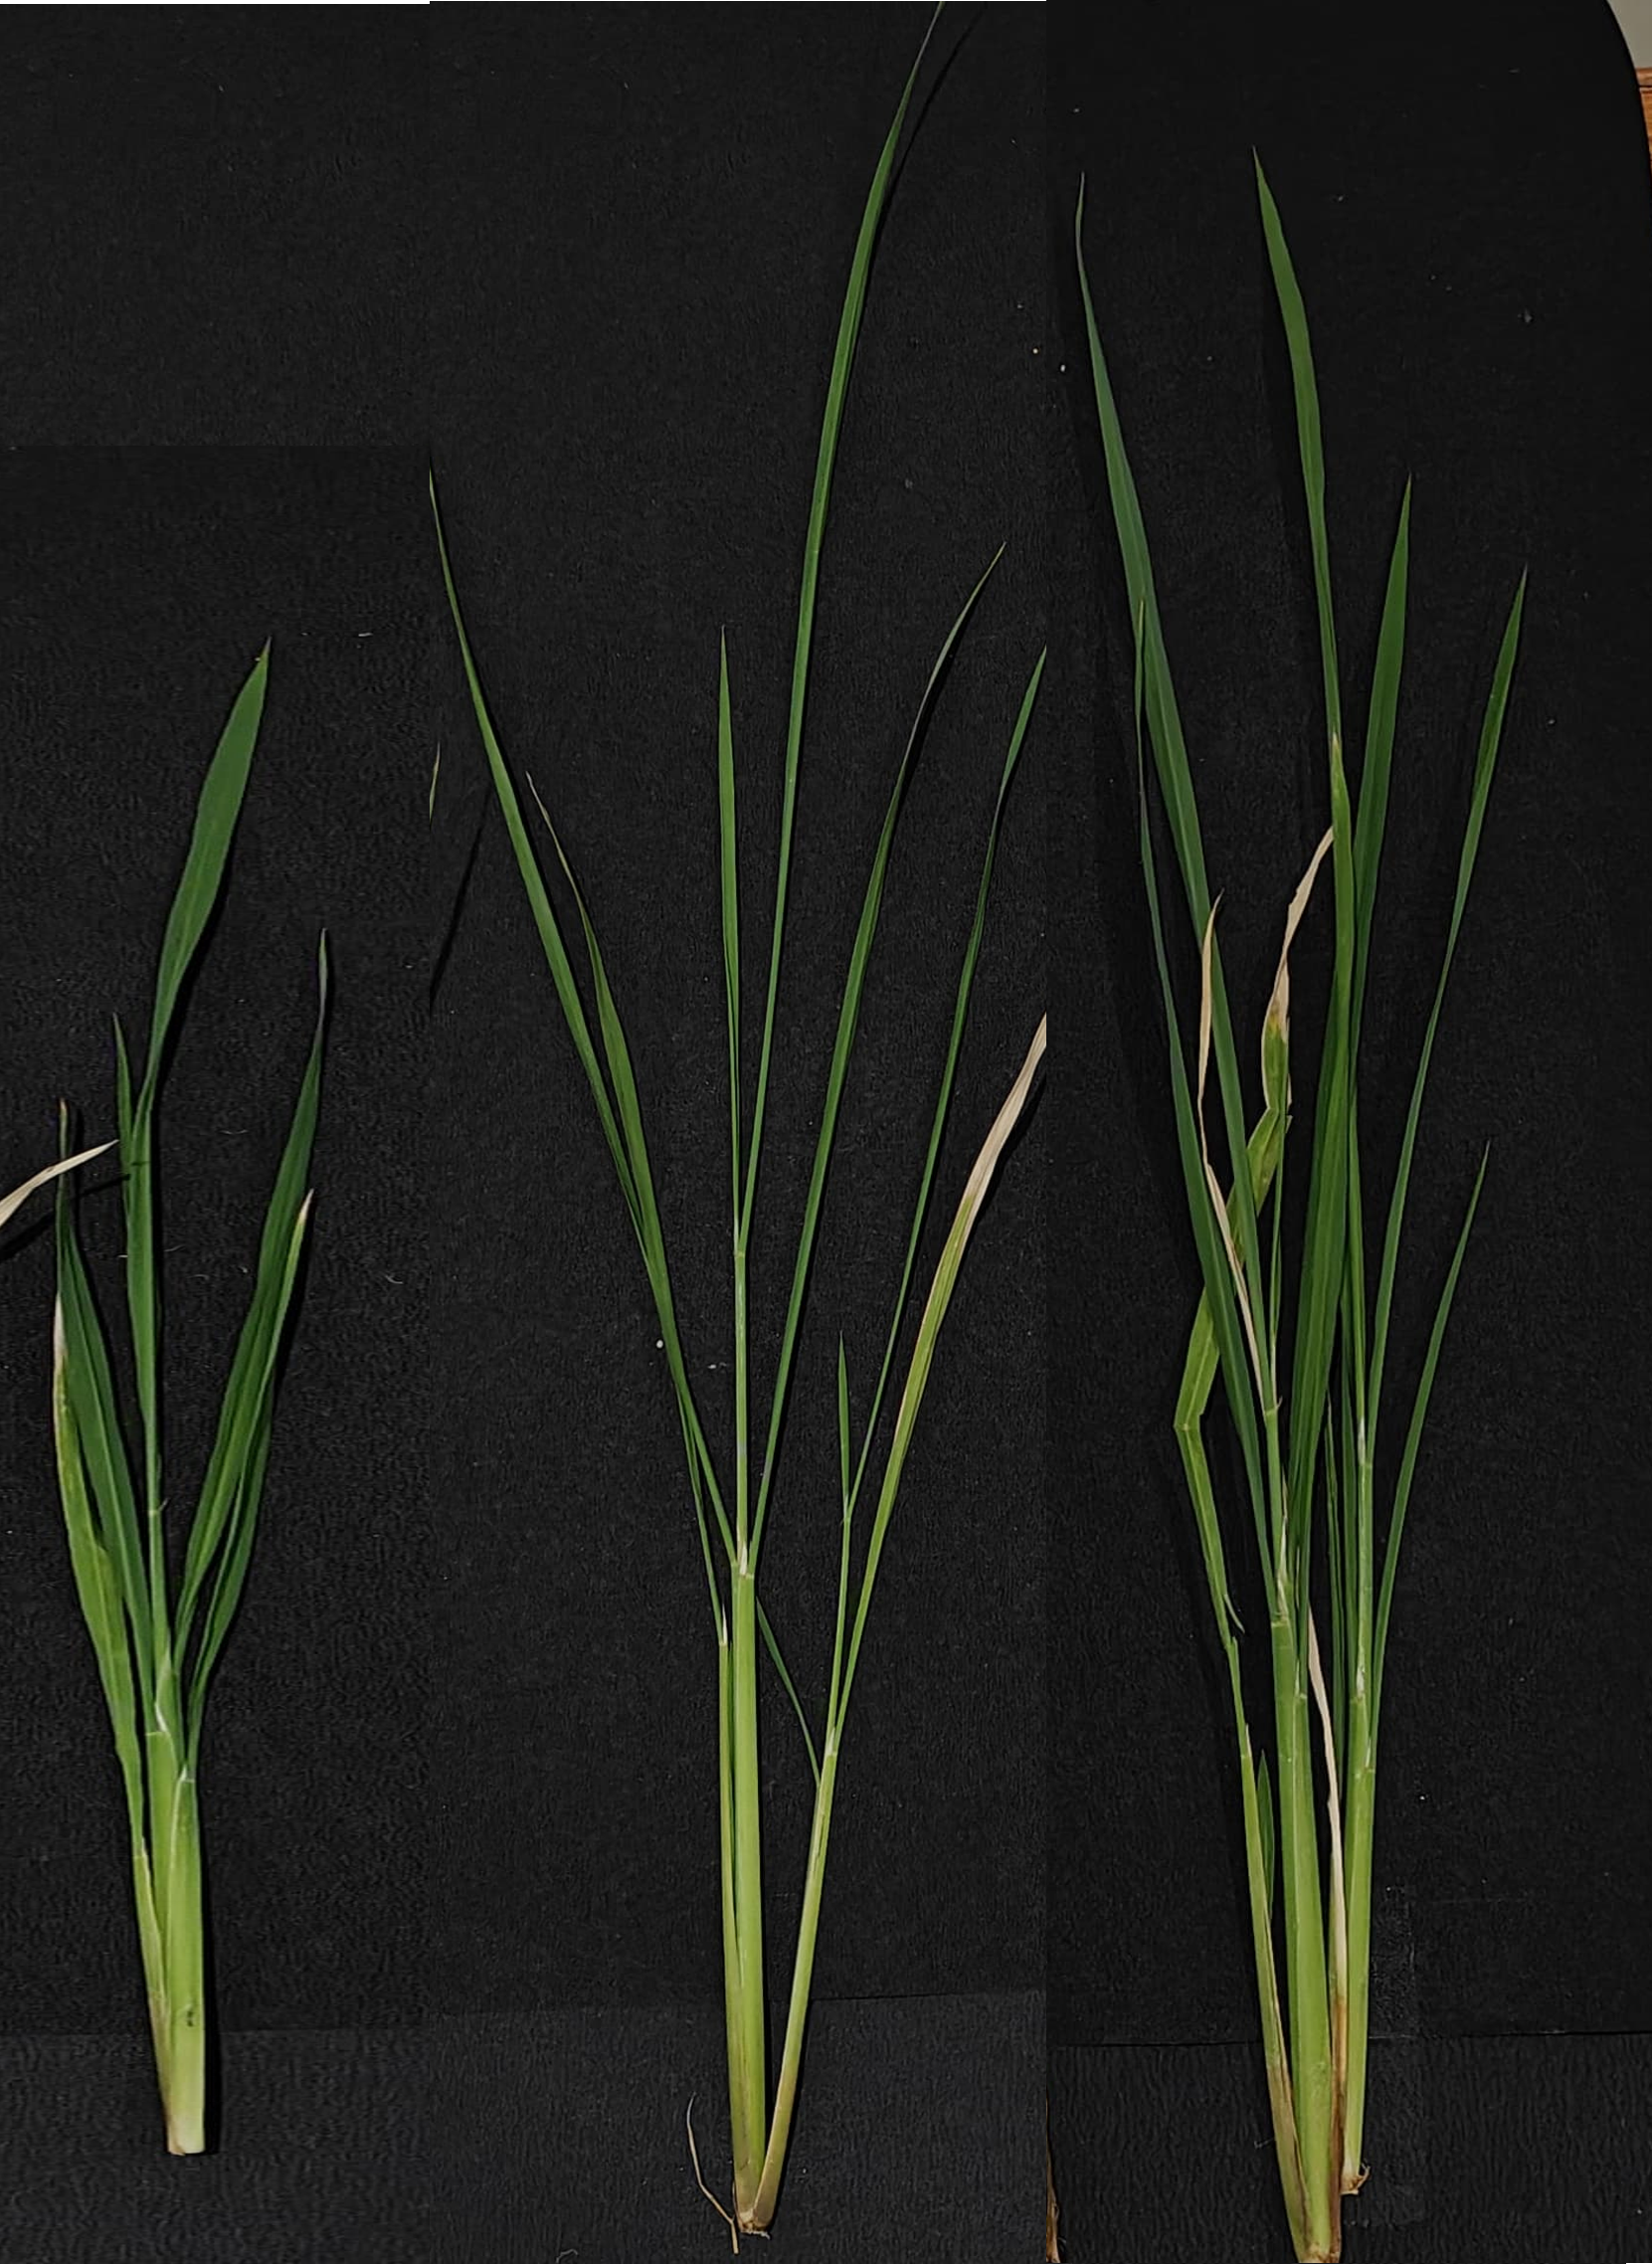


**Synthesized chitosan Plant**

**Commercial chitosan Plant**

**Control Plant**

Supplementary Fig. 1 The stem length of the control plant (only water), seed primed by synthesized chitosan, and seed primed with commercial chitosan


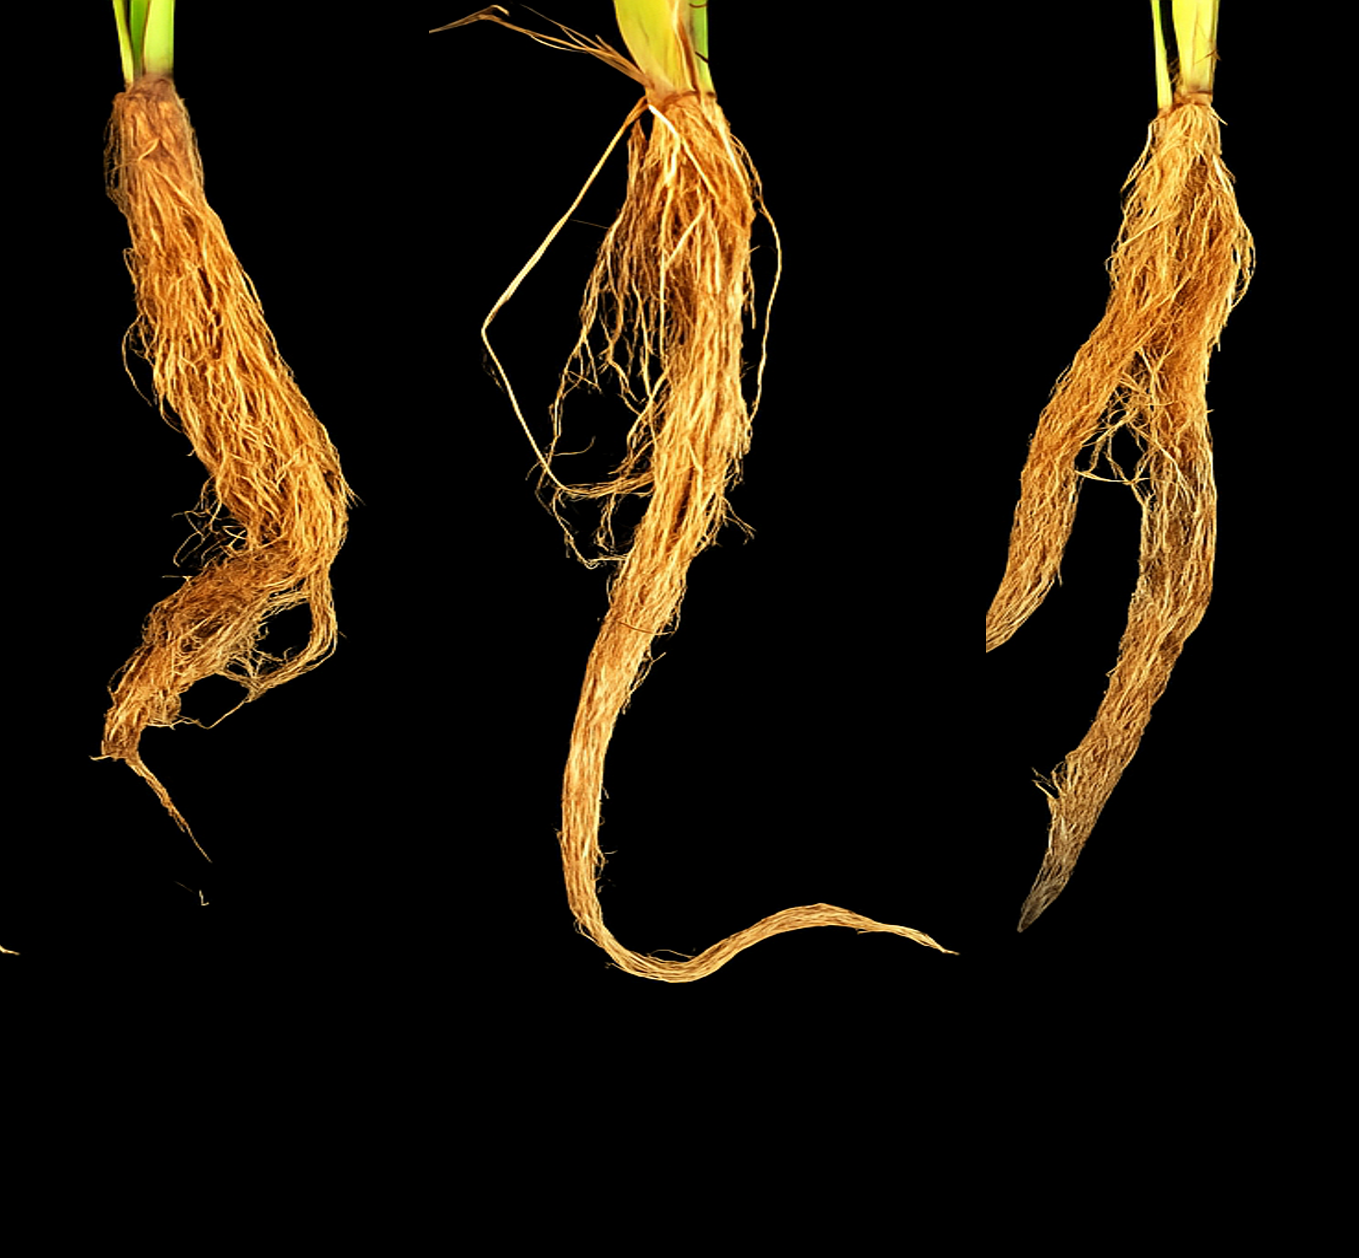


**Commercial chitosan Plant**

**Synthesized chitosan Plant**

**Control Plant**

Supplementary Fig. 2 The root length and thickness of the control plant (only water), seed primed by synthesized chitosan, and seed primed with commercial chitosan


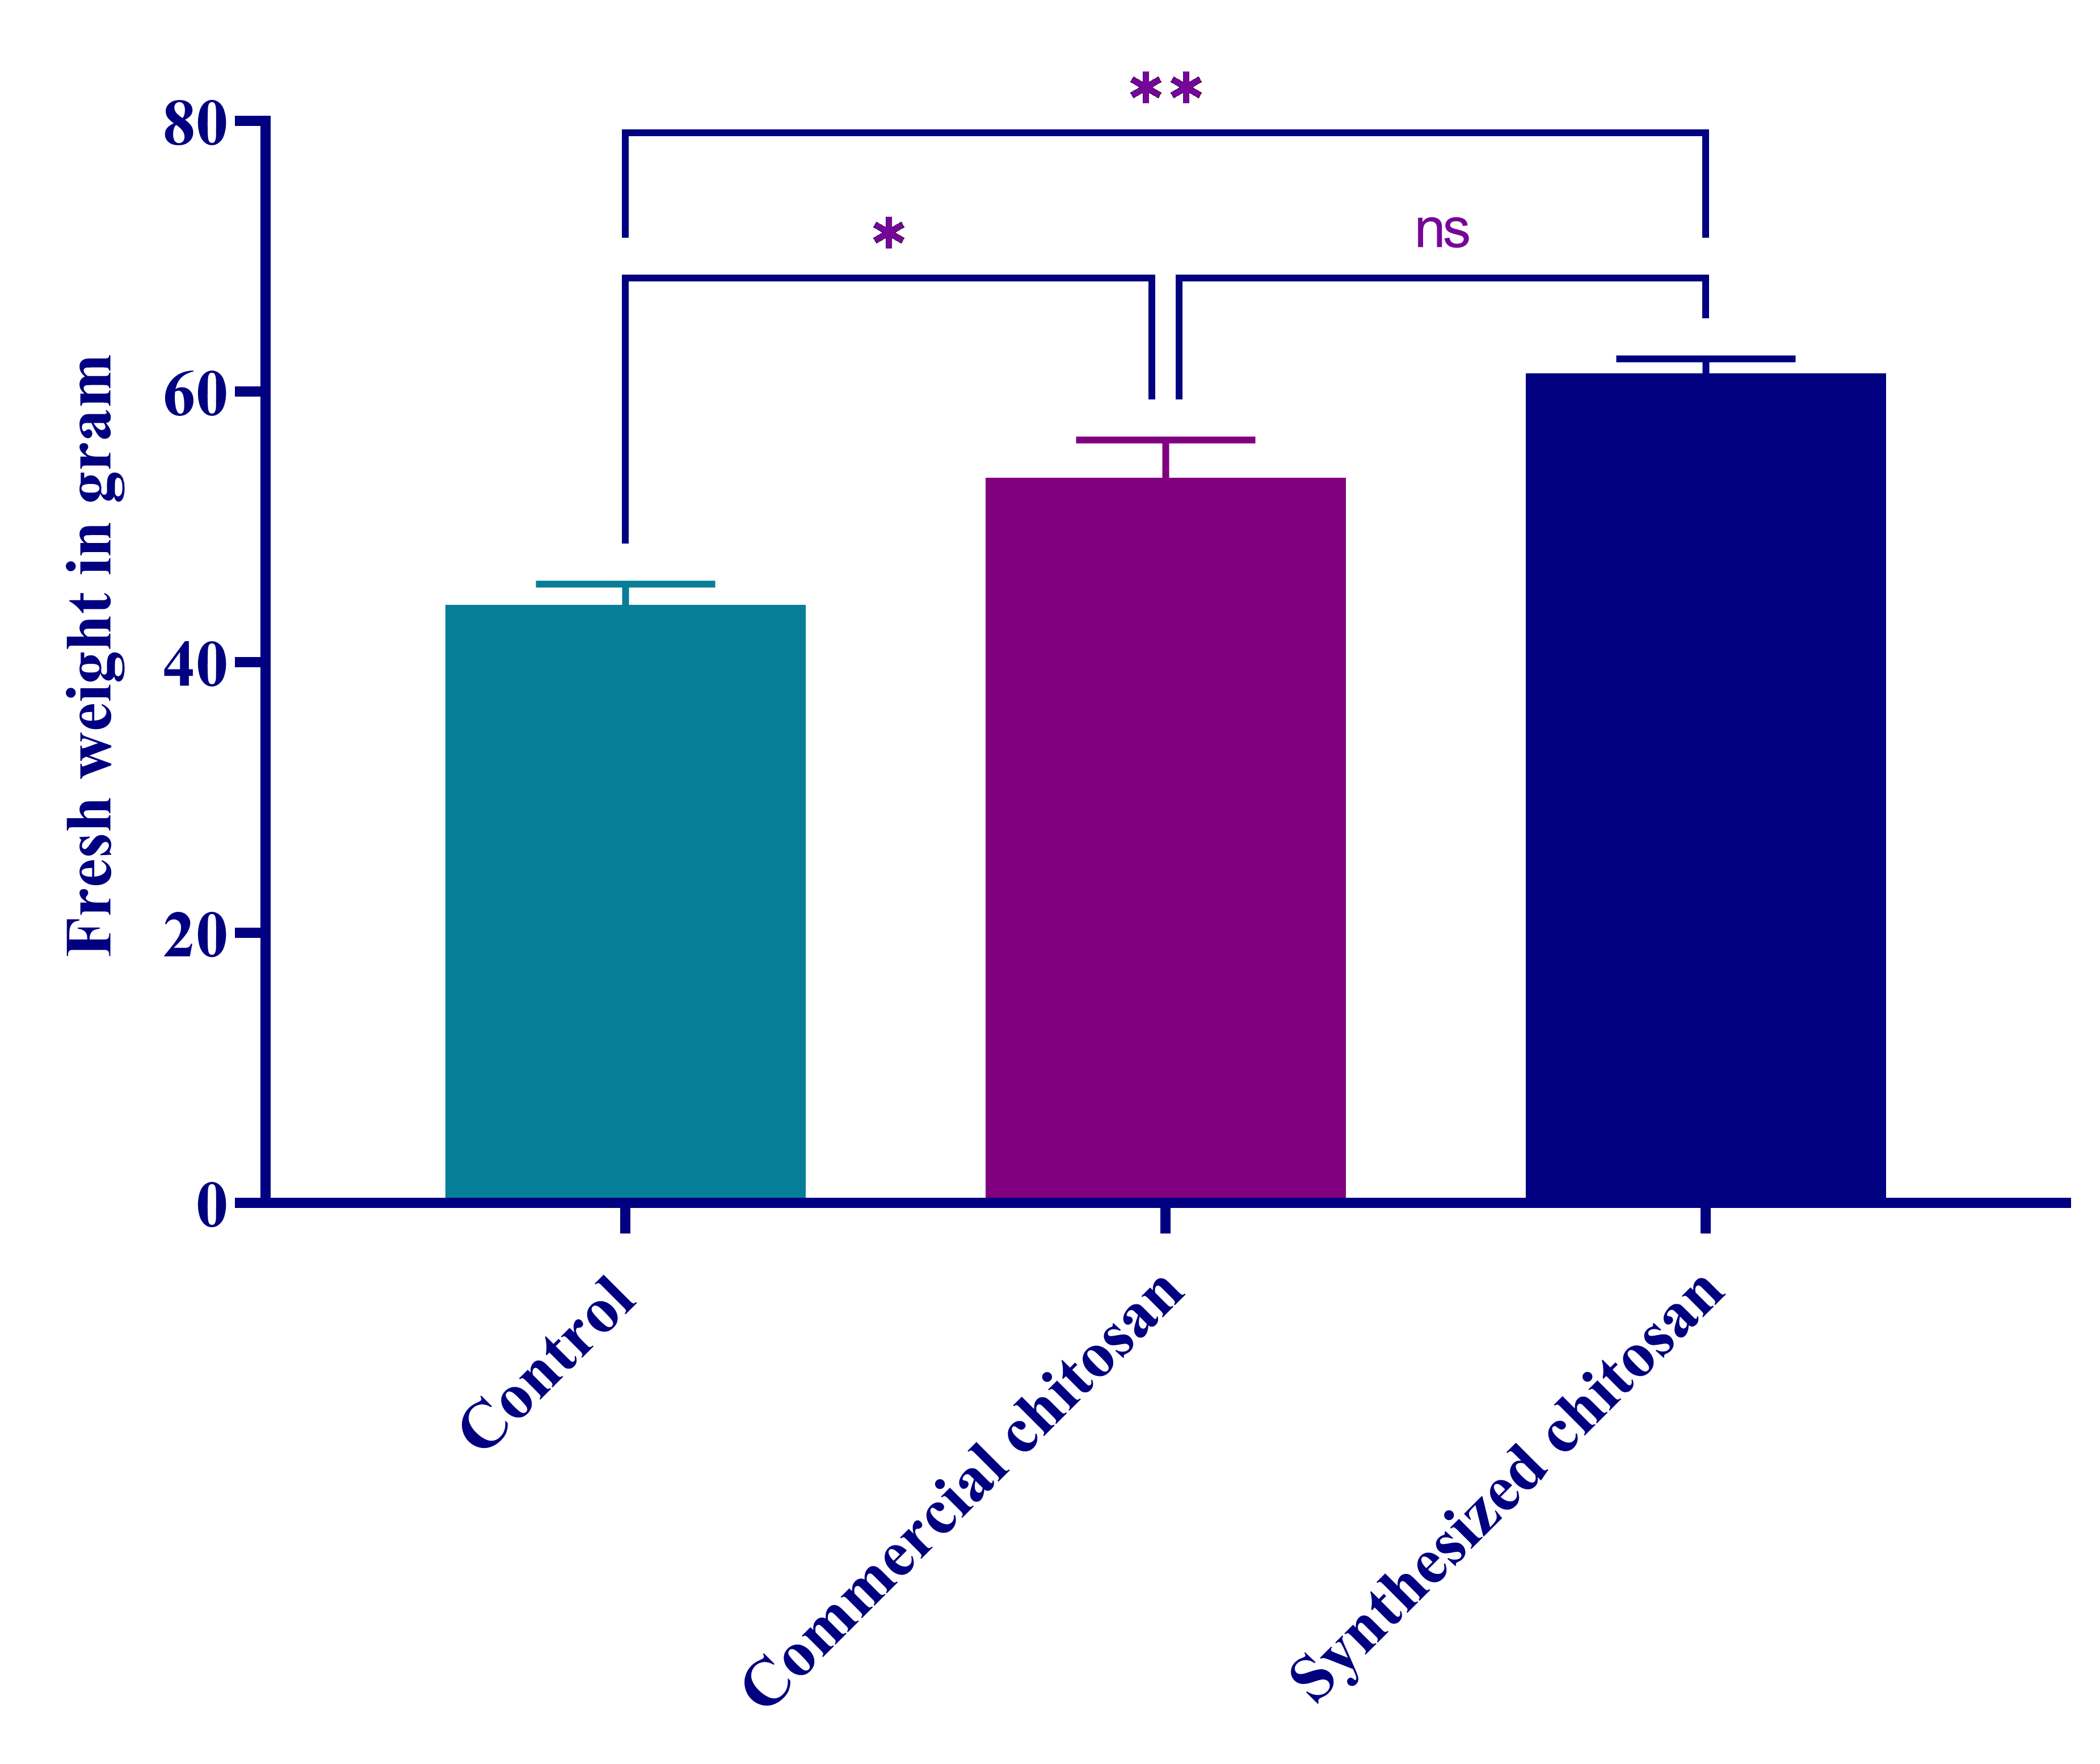

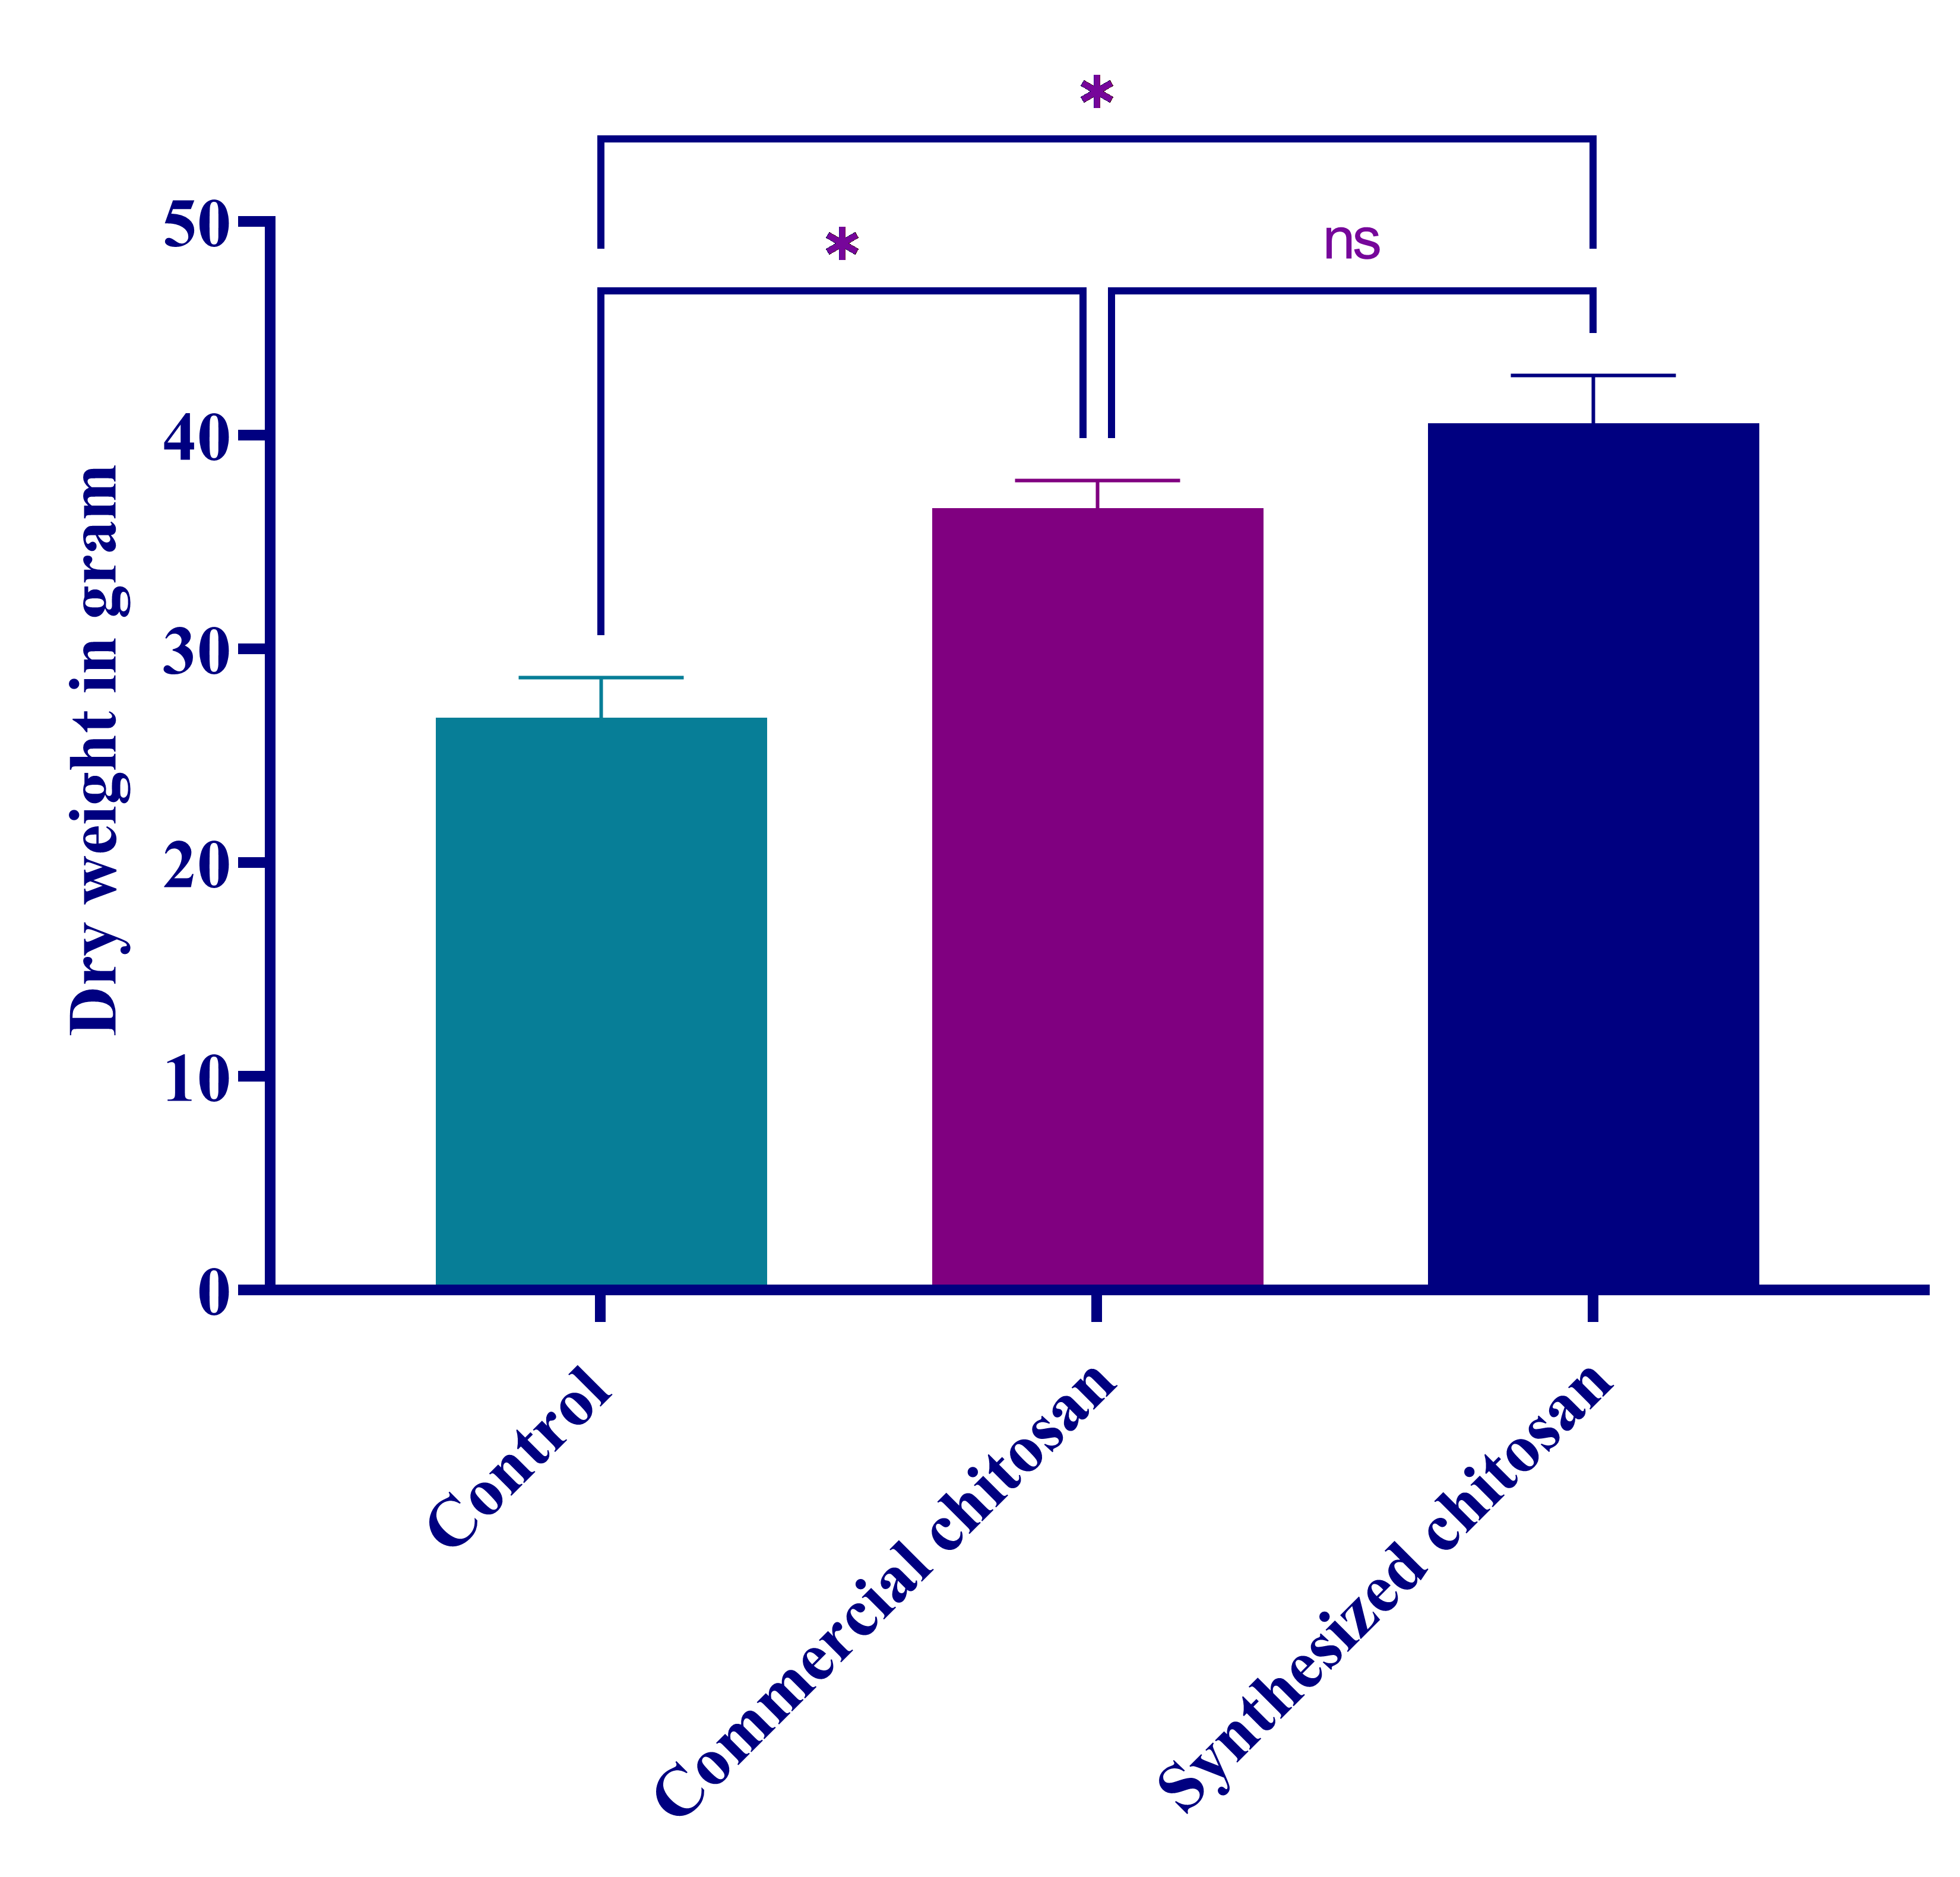


**3a**

**3b**

Supplementary Fig. 3 Effect of the chitosan on biomass accumulation of the rice plants: A) Fresh weight; B) Dry weight. Data were expressed as mean ± standard deviation (SD), and differences between treatment groups were analyzed using one-way ANOVA, followed by Tukey’s post hoc test. Statistical significance was determined at *p* ≤ 0.05. The following notation was used to indicate significance levels: *ns* (not significant) for *p* > 0.05, *p* = 0.03 as *, *p* = 0.0021 as **, and *p* = 0.0002 as ***.


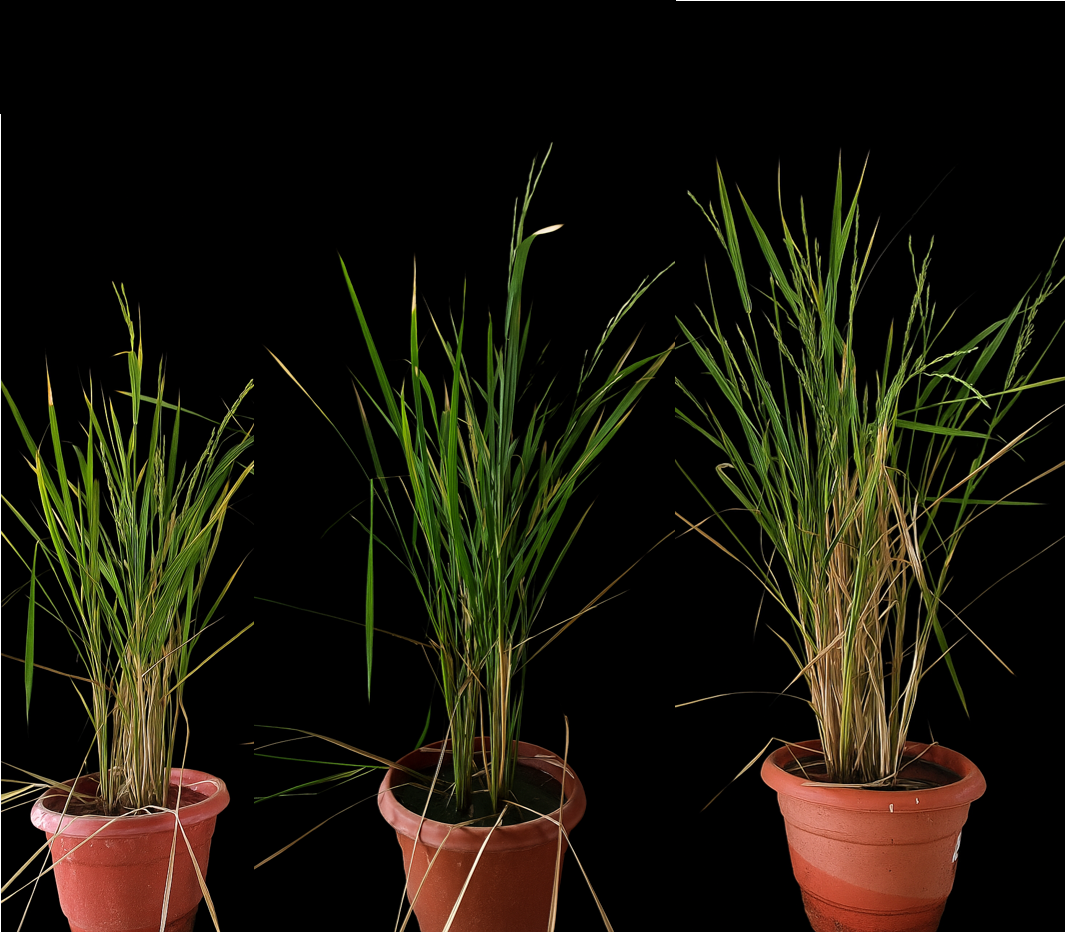


**Control Plant**

**Synthesized chitosan Plant**

**Commercial chitosan Plant**

Supplementary Fig. 4 Efffect of chitosan on physiological and reproductive traits on rice plants

**Control Plant**


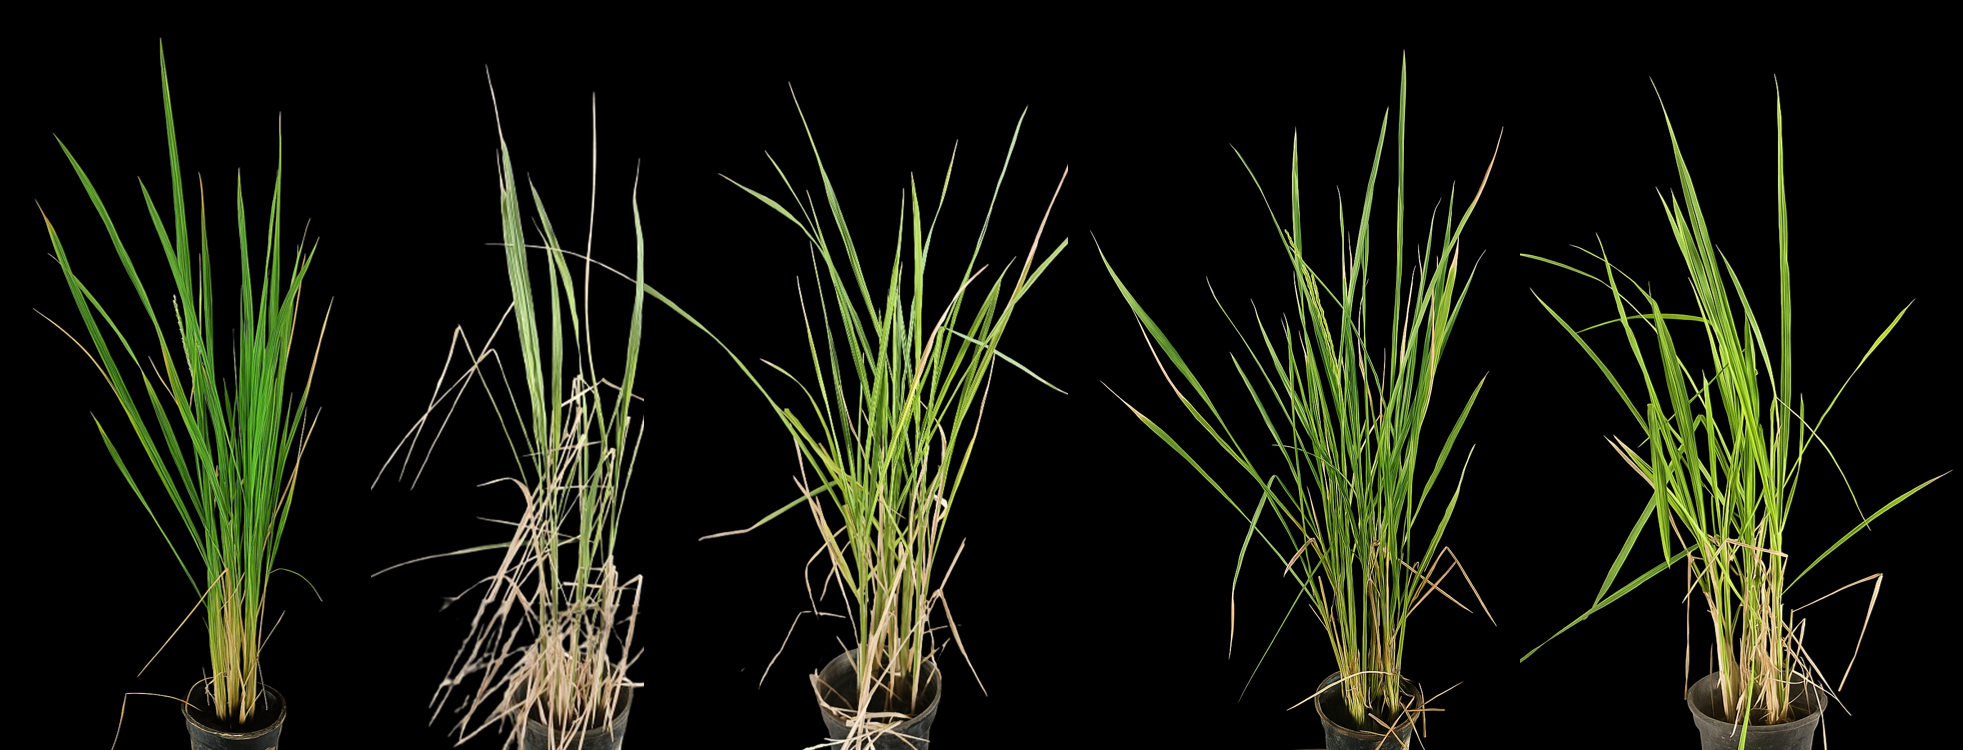


**Only Fungus**

**Fungus + Commercial chitosan**

**Fungus + Synthesized chitosan**

**Fungus + Fungicide**

**Control Plant**

Supplementary Fig. 5: Physiological conditions of the plants after foliar application of chitosan and commercial fungicide (*Trichoderma viridae)* on the fungus affected plants
